# Supplementary material for: Trends in Diet Quality and Increasing Inadequacies of Micronutrients Vitamin C, Vitamin B12, Iron and Potassium in US Type 2 Diabetic Adults
Source: MDPI journal article supplement (doi:10.3390/nu15081980), 2023-04-20
Supplement: s1 [file s1]

## Supplemental Tables (s1 to s2)

Table s1. Standards for scoring of dietary components of Healthy Eating Index-2015

|                            | Maximum points | standard for maximum score                           | Standard for minimum score of zero                 |
|----------------------------|----------------|------------------------------------------------------|----------------------------------------------------|
| Adequacy Component         |                |                                                      |                                                    |
| Total fruit                | 5              | $\geq 0.8^a$ c equivalents/1000 kcal                 | No fruit                                           |
| Whole fruit                | 5              | $\geq 0.4$ c equivalents/1000 kcal                   | No whole fruit                                     |
| Total vegetables           | 5              | $\geq 1.1$ c equivalents/1000 kcal                   | No vegetables                                      |
| Greens and beans           | 5              | $\geq 0.2$ c equivalents/1000 kcal                   | No dark green vegetables or beans and peas         |
| Whole grains               | 10             | $\geq 1.5^b$ oz equivalents/1000 kcal                | No whole grains                                    |
| Total dairy                | 10             | $\geq 1.3$ c equivalents/1000 kcal                   | No dairy                                           |
| Total protein foods        | 5              | $\geq 2.5$ oz equivalents/1000 kcal                  | No protein foods                                   |
| Seafood and plant proteins | 5              | $\geq 0.8$ c equivalents/1000 kcal                   | No seafood or plant                                |
| Fatty Acids                | 10             | $^c(\text{PUFAs}+\text{MUFAs})/\text{SFAs} \geq 2.5$ | $(\text{PUFAs}+\text{MUFAs})/\text{SFAs} \leq 1.2$ |
| Moderation Component       |                |                                                      |                                                    |
| Sodium                     | 10             | $\leq 1.8$ oz equivalents/1000 kcal                  | $\geq 4.3$ oz equivalents/1000 kcal                |
| Refined grains             | 10             | $\leq 1.1$ g/1000 kcal                               | $\geq 2.0$ g/1000 kcal                             |
| Saturated fats             | 10             | $\leq 6.5\%$ of energy                               | $\geq 26\%$ of energy                              |
| Added sugars               | 10             | $\leq 8\%$ of energy                                 | $\geq 16\%$ of energy                              |

Abbreviation: <sup>a</sup>c :cups, <sup>b</sup>oz: ounces, <sup>c</sup>PUFAs and MUFAs, poly-and monosaturated fatty acids; SFAs, saturated fatty acids

Table s2. Definition of major categories of dietary components by food sources (from USDA)<sup>a</sup>

| Category            | Items                                                                                                                                                                                                                                                                                                                        |
|---------------------|------------------------------------------------------------------------------------------------------------------------------------------------------------------------------------------------------------------------------------------------------------------------------------------------------------------------------|
| Whole Fruits        | Intact fruits (whole or cut) of citrus, melons, and berries                                                                                                                                                                                                                                                                  |
| Total fruits        | Total intact fruits (whole or cut) and fruit juices                                                                                                                                                                                                                                                                          |
| Dark Vegetables     | Dark green vegetables                                                                                                                                                                                                                                                                                                        |
| Tomato and products | Tomatoes and tomato products                                                                                                                                                                                                                                                                                                 |
| Potatoes            | White potatoes (cup eq.)                                                                                                                                                                                                                                                                                                     |
| Total Vegetables    | Total dark green, red and orange, starchy, and other vegetables; excludes legumes                                                                                                                                                                                                                                            |
| Whole grain         | Whole-wheat flour, bulgur (cracked wheat), whole barley, whole-barley flour, oatmeal, oats, rye, whole cornmeal, popcorn, wild rice, brown rice, etc.                                                                                                                                                                        |
| Refined grain       | White flour, de-germed cornmeal, white bread, white rice, etc.                                                                                                                                                                                                                                                               |
| Total grain         | Total whole and refined grains                                                                                                                                                                                                                                                                                               |
| Nuts and Seeds      | Peanuts, tree nuts, and seeds; excludes coconut                                                                                                                                                                                                                                                                              |
| Meat                | Beef, veal, pork, lamb, and game meat; excludes organ meat and cured meat                                                                                                                                                                                                                                                    |
| Poultry             | Chicken, turkey, Cornish hens, duck, goose, quail, and pheasant (game birds); excludes organ meat and cured meat                                                                                                                                                                                                             |
| Seafood             | Finfish, shellfish, and other seafood                                                                                                                                                                                                                                                                                        |
| Total meat          | Total of meat, poultry, seafood, organ meat, and cured meat                                                                                                                                                                                                                                                                  |
| Egg                 | Eggs; egg whites or egg beaters; omega-3 fortified eggs; mayonnaise                                                                                                                                                                                                                                                          |
| Milk                | Skim milk; 1 or 2 milk; whole milk                                                                                                                                                                                                                                                                                           |
| Cheese              | cottage or ricotta cheese; other cheese e.g. American, cheddar, etc.                                                                                                                                                                                                                                                         |
| Total Dairy         | Total milk, yogurt, cheese, and whey.                                                                                                                                                                                                                                                                                        |
| Oils                | Fats naturally present in nuts, seeds, and seafood; all un-hydrogenated vegetable oils, except palm oil, palm kernel oil, and coconut oils; the fat present in avocado and olives above the allowable amount; 50% of the fat present in stick and tub margarines and margarine spreads (grams)                               |
| Solid fats          | Fats naturally present in meat, poultry, eggs, and dairy (lard, tallow, and butter); fully or partially hydrogenated oils; shortening; palm oil; palm kernel oil; coconut oils; fats naturally present in coconut meat and cocoa butter; and 50 of the fat present in stick and tub margarines and margarine spreads (grams) |

|              |                                                         |
|--------------|---------------------------------------------------------|
| Added sugars | Caloric sweeteners such as syrups and sugars and others |
|--------------|---------------------------------------------------------|

<sup>a</sup>Note: definitions are adapted from [https://www.ars.usda.gov/ARUserFiles/80400530/pdf/fped/FPED\\_1718.pdf](https://www.ars.usda.gov/ARUserFiles/80400530/pdf/fped/FPED_1718.pdf)
